CORRECTION

# Correction: Growth of the hard palate in infants with Down syndrome compared with healthy infants—A retrospective case control study

Daniel Klingel, Ariane Hohoff, Robert Kwiecien, Dirk Wiechmann, Thomas Stamm

A reference is omitted from the second sentence of the third paragraph in the Introduction section.

The sentence should read: The hard palate of DS adolescents is often described as high arched and constricted or narrow [4, 11, 12], but data in the literature are contradictory [13, 14], depending on patient age [23] of the studied DS group.

## Reference

1. Klingel D, Hohoff A, Kwiecien R, Wiechmann D, Stamm T (2017) Growth of the hard palate in infants with Down syndrome compared with healthy infants—A retrospective case control study. PLoS ONE 12(8): e0182728. <https://doi.org/10.1371/journal.pone.0182728> PMID: 28796822

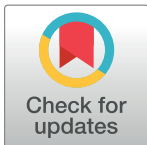

## OPEN ACCESS

**Citation:** Klingel D, Hohoff A, Kwiecien R, Wiechmann D, Stamm T (2018) Correction: Growth of the hard palate in infants with Down syndrome compared with healthy infants—A retrospective case control study. PLoS ONE 13(9): e0203899. <https://doi.org/10.1371/journal.pone.0203899>

**Published:** September 7, 2018

**Copyright:** © 2018 Klingel et al. This is an open access article distributed under the terms of the [Creative Commons Attribution License](https://creativecommons.org/licenses/by/4.0/), which permits unrestricted use, distribution, and reproduction in any medium, provided the original author and source are credited.
